# Supplementary material
Source: PubMed Central journal article supplement (PMC4564947)

A. Related to panel c in Figure 4

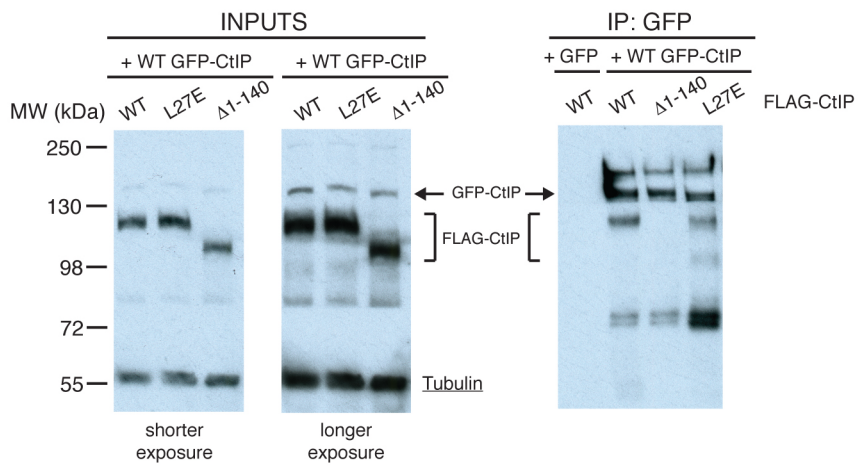

B. Related to panel d in Figure 4

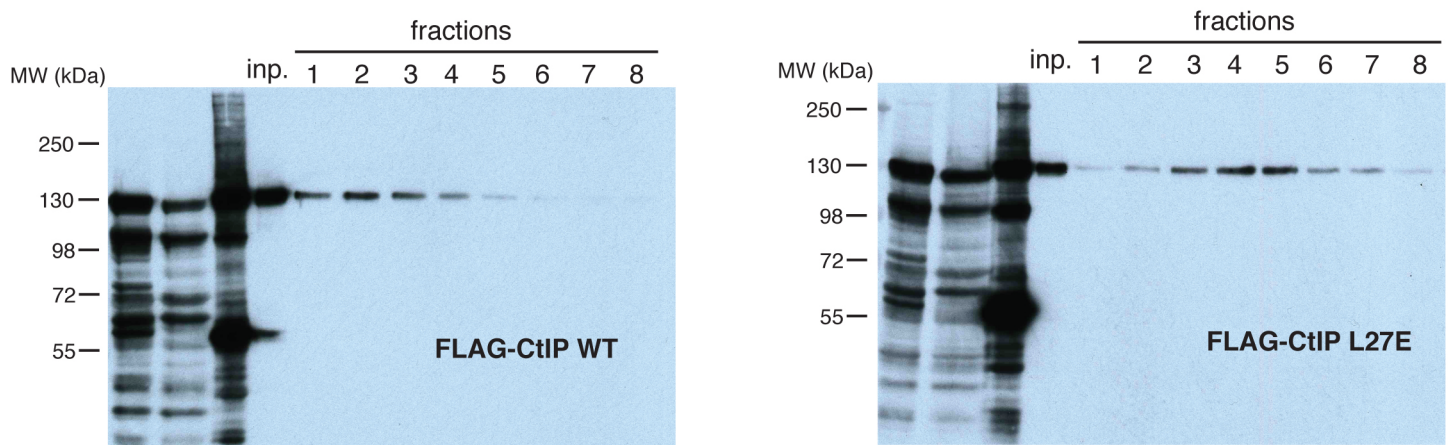

C. Related to panel c in Figure 6

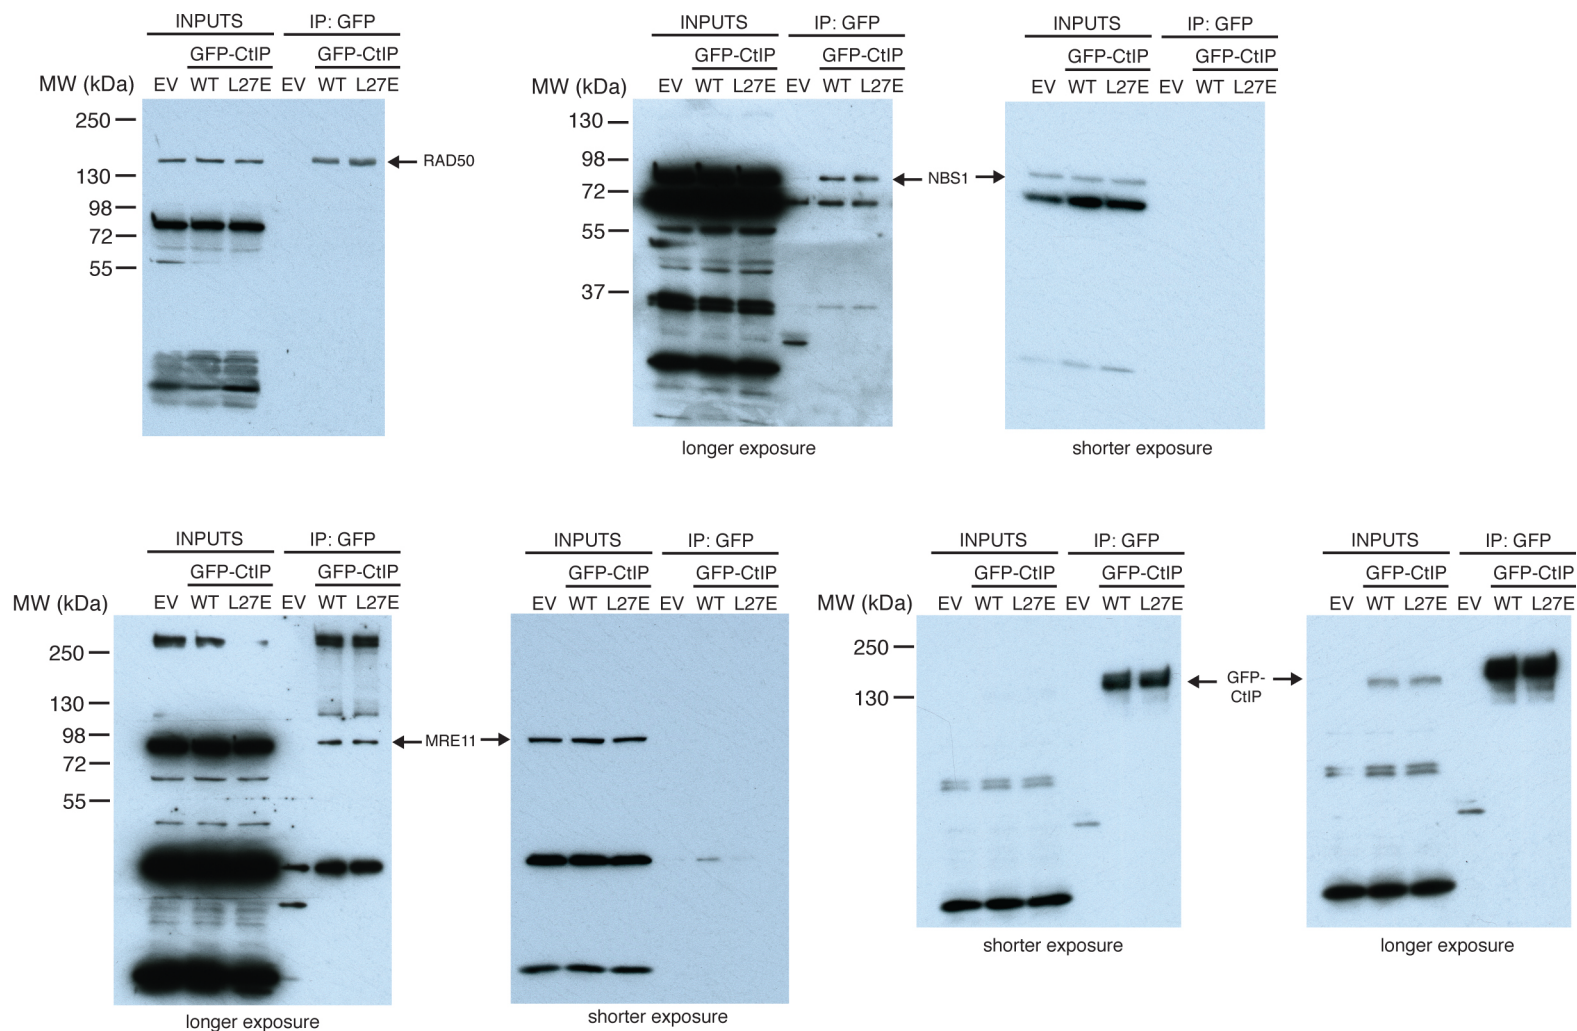

Supplement: NIHMS61179-supplement-2.pdf [file NIHMS61179-supplement-2.pdf]
